# Supplementary material for: Gut Microbiome Directs Hepatocytes to Recruit MDSCs and Promote Cholangiocarcinoma
Source: Oxford University Press journal article supplement (doi:10.1158/2159-8290.cd-20-0304), 2020-12-15
Supplement: 21598290cd200304-sup-239155_2_supp_6747210_qkbm9n.xlsx [file 21598290cd200304-sup-239155_2_supp_6747210_qkbm9n.xlsx]

## Sheet: mutations
Hugo Symbol	Sample ID	Variant Classification	Variant Type	Consequence	Chromosome	Start Position	End Position	Strand	Reference Allele	Tumor Genotype	Normal Genotype	Transcript Change	Protein Change	Normal Depth	Normal Ref Depth	Normal Alt Depth	Tumor Depth	Tumor Ref Depth	Tumor Alt Depth	Tumor Alt Frequency	Existing Annotation	gnomAD Frequency	ExAC Frequency	1000Genomes Frequency
1700001C19Rik	LD_1	Missense_Mutation	SNP	missense_variant	chr17	47436734	47436734	+	G	G/C	G/G	c.85C>G	p.P29A	-	-	-	32	26	6	0.1875	-	-	-	-
1700015F17Rik	LD_1	Missense_Mutation	SNP	missense_variant	chr5	5478914	5478914	+	T	T/G	T/T	c.100A>C	p.T34P	-	-	-	67	51	16	0.238806	-	-	-	-
2310022A10Rik	LD_1	Missense_Mutation	SNP	missense_variant	chr7	27574696	27574696	+	C	C/T	C/C	c.626C>T	p.T209M	-	-	-	44	31	13	0.295455	-	-	-	-
2310061I04Rik	LD_1	Missense_Mutation	SNP	missense_variant	chr17	35892918	35892918	+	C	C/T	C/C	c.883G>A	p.G295R	-	-	-	71	52	19	0.267606	-	-	-	-
4931406P16Rik	LD_1	Missense_Mutation	SNP	missense_variant	chr7	34239217	34239217	+	C	C/G	C/C	c.2892G>C	p.W964C	-	-	-	31	17	14	0.451613	-	-	-	-
Abhd11	LD_1	Missense_Mutation	SNP	missense_variant	chr5	135011018	135011018	+	C	C/G	C/C	c.396C>G	p.H132Q	-	-	-	44	33	11	0.25	-	-	-	-
Ackr1	LD_1	Missense_Mutation	SNP	missense_variant	chr1	173332397	173332397	+	G	G/A	G/G	c.554C>T	p.A185V	-	-	-	72	51	21	0.291667	-	-	-	-
Afg3l1	LD_1	Missense_Mutation	SNP	missense_variant	chr8	123501281	123501281	+	C	C/A	C/C	c.1804C>A	p.P602T	-	-	-	45	12	33	0.733333	-	-	-	-
Afg3l1	LD_1	Missense_Mutation	SNP	missense_variant	chr8	123501518	123501518	+	G	G/A	G/G	c.1960G>A	p.V654M	-	-	-	61	20	41	0.672131	-	-	-	-
Afg3l1	LD_1	Missense_Mutation	SNP	missense_variant	chr8	123501666	123501666	+	G	G/T	G/G	c.2108G>T	p.R703L	-	-	-	37	11	26	0.702703	-	-	-	-
Akap9	LD_1	Missense_Mutation	SNP	missense_variant	chr5	4064639	4064639	+	G	G/C	G/G	c.9917G>C	p.G3306A	-	-	-	32	0	32	1	-	-	-	-
Akt1	LD_1	Splice_Site	SNP	splice_donor_variant	chr12	112655126	112655126	+	C	C/T	C/C	c.1363+1G>A	p.X455_splice	-	-	-	47	35	12	0.255319	-	-	-	-
Akt1	LD_1	Splice_Site	DEL	splice_acceptor_variant,splice_donor_variant,intron_variant	chr12	112657197	112657267	+	CTGTGTGGGAAGGCGCTCAGTCAGTGAGGCCAGACCCCCCAGCCCCCACCCGCCCTGCTCCATAAGCACAC	CTGTGTGGGAAGGCGCTCAGTCAGTGAGGCCAGACCCCCCAGCCCCCACCCGCCCTGCTCCATAAGCACAC/-	CTGTGTGGGAAGGCGCTCAGTCAGTGAGGCCAGACCCCCCAGCCCCCACCCGCCCTGCTCCATAAGCACAC/CTGTGTGGGAAGGCGCTCAGTCAGTGAGGCCAGACCCCCCAGCCCCCACCCGCCCTGCTCCATAAGCACAC	c.828+1_829-1del	p.X276_splice	-	-	-	176	41	135	0.767045	-	-	-	-
Akt1	LD_1	Splice_Site	SNP	splice_donor_variant	chr12	112657666	112657666	+	C	C/G	C/C	c.702+1G>C	p.X234_splice	-	-	-	75	61	14	0.186667	-	-	-	-
Ankfn1	LD_1	Missense_Mutation	SNP	missense_variant	chr11	89391669	89391669	+	C	C/A	C/C	c.1151G>T	p.S384I	-	-	-	46	0	46	1	-	-	-	-
Ankrd26	LD_1	Missense_Mutation	SNP	missense_variant	chr6	118508652	118508652	+	C	C/A	C/C	c.4260G>T	p.E1420D	-	-	-	99	94	5	0.0505051	-	-	-	-
Arhgef28	LD_1	Missense_Mutation	SNP	missense_variant	chr13	98053834	98053834	+	C	C/A	C/C	c.616G>T	p.A206S	-	-	-	53	37	16	0.301887	-	-	-	-
Arnt2	LD_1	Nonsense_Mutation	SNP	stop_gained	chr7	84263210	84263210	+	C	C/T	C/C	c.1721G>A	p.W574*	-	-	-	34	15	19	0.558824	-	-	-	-
Arrb2	LD_1	Frame_Shift_Ins	INS	frameshift_variant	chr11	70436663	70436664	+	-	-/G	-/-	c.263_264insG	p.F88Lfs*59	-	-	-	38	28	10	0.263158	-	-	-	-
Atg9b	LD_1	Missense_Mutation	SNP	missense_variant	chr5	24385255	24385255	+	G	G/A	G/G	c.2753C>T	p.T918I	-	-	-	66	52	14	0.212121	-	-	-	-
Auts2	LD_1	Frame_Shift_Del	DEL	frameshift_variant	chr5	131440230	131440230	+	G	G/-	G/G	c.2248del	p.Q750Rfs*29	-	-	-	36	24	12	0.333333	-	-	-	-
Bcar1	LD_1	Frame_Shift_Del	DEL	frameshift_variant	chr8	111713811	111713817	+	CCGTGAA	CCGTGAA/-	CCGTGAA/CCGTGAA	c.1544_1550del	p.V515Gfs*14	-	-	-	50	35	15	0.3	-	-	-	-
Bdp1	LD_1	Missense_Mutation	SNP	missense_variant	chr13	100089415	100089415	+	C	C/T	C/C	c.958G>A	p.V320I	-	-	-	77	24	53	0.688312	-	-	-	-
Bnc1	LD_1	Missense_Mutation	SNP	missense_variant	chr7	81973724	81973724	+	G	G/A	G/G	c.1754C>T	p.P585L	-	-	-	72	38	34	0.472222	-	-	-	-
Brip1	LD_1	Missense_Mutation	SNP	missense_variant	chr11	86152647	86152647	+	C	C/A	C/C	c.1090G>T	p.D364Y	-	-	-	95	80	15	0.157895	-	-	-	-
Btnl4	LD_1	Missense_Mutation	SNP	missense_variant	chr17	34472784	34472784	+	A	A/C	A/A	c.730T>G	p.F244V	-	-	-	119	83	36	0.302521	-	-	-	-
Cacna1i	LD_1	Missense_Mutation	SNP	missense_variant	chr15	80361926	80361926	+	C	C/G	C/C	c.1520C>G	p.A507G	-	-	-	33	15	18	0.545455	-	-	-	-
Caln1	LD_1	Missense_Mutation	SNP	missense_variant	chr5	130506141	130506141	+	G	G/A	G/G	c.197G>A	p.G66D	-	-	-	86	72	14	0.162791	-	-	-	-
Cand2	LD_1	Missense_Mutation	SNP	missense_variant	chr6	115789710	115789710	+	C	C/G	C/C	c.1275C>G	p.N425K	-	-	-	43	9	34	0.790698	-	-	-	-
Catsperb	LD_1	Missense_Mutation	SNP	missense_variant	chr12	101587994	101587994	+	A	A/G	A/A	c.1946A>G	p.H649R	-	-	-	53	36	17	0.320755	-	-	-	-
Cdh19	LD_1	Missense_Mutation	SNP	missense_variant	chr1	110889972	110889972	+	T	T/C	T/T	c.2039A>G	p.Y680C	-	-	-	66	49	17	0.257576	-	-	-	-
Cdh8	LD_1	Missense_Mutation	SNP	missense_variant	chr8	99190439	99190439	+	T	T/G	T/T	c.1043A>C	p.K348T	-	-	-	58	27	31	0.534483	-	-	-	-
Ces3a	LD_1	Missense_Mutation	SNP	missense_variant	chr8	105056436	105056436	+	G	G/C	G/G	c.1196G>C	p.G399A	-	-	-	131	83	48	0.366412	-	-	-	-
Chd5	LD_1	Missense_Mutation	SNP	missense_variant	chr4	152377125	152377125	+	G	G/T	G/G	c.3893G>T	p.R1298L	-	-	-	40	0	40	1	-	-	-	-
Chl1	LD_1	Missense_Mutation	SNP	missense_variant	chr6	103649552	103649552	+	A	A/G	A/A	c.260A>G	p.N87S	-	-	-	100	72	28	0.28	-	-	-	-
Clca3a1	LD_1	Missense_Mutation	SNP	missense_variant	chr3	144754866	144754866	+	T	T/C	T/T	c.826A>G	p.I276V	-	-	-	185	101	84	0.454054	-	-	-	-
Cntn6	LD_1	Missense_Mutation	SNP	missense_variant	chr6	104726120	104726120	+	G	G/C	G/G	c.502G>C	p.E168Q	-	-	-	74	59	15	0.202703	-	-	-	-
Col19a1	LD_1	Missense_Mutation	SNP	missense_variant	chr1	24306285	24306285	+	C	C/T	C/C	c.2357G>A	p.G786D	-	-	-	106	78	28	0.264151	-	-	-	-
Csn1s1	LD_1	Missense_Mutation	SNP	missense_variant	chr5	87674216	87674216	+	A	A/G	A/A	c.344A>G	p.E115G	-	-	-	72	49	23	0.319444	-	-	-	-
Cstf2t	LD_1	Missense_Mutation	SNP	missense_variant	chr19	31084317	31084317	+	G	G/A	G/G	c.1252G>A	p.D418N	-	-	-	68	63	5	0.0735294	-	-	-	-
Ctcf	LD_1	Missense_Mutation	SNP	missense_variant	chr8	105681551	105681551	+	G	G/C	G/G	c.2143G>C	p.A715P	-	-	-	35	17	18	0.514286	-	-	-	-
Cts3	LD_1	Missense_Mutation	SNP	missense_variant	chr13	61564964	61564964	+	G	G/T	G/G	c.941C>A	p.A314D	-	-	-	175	107	68	0.388571	-	-	-	-
Cul9	LD_1	Missense_Mutation	SNP	missense_variant	chr17	46522219	46522219	+	T	T/A	T/T	c.3932A>T	p.Q1311L	-	-	-	84	56	28	0.333333	-	-	-	-
Dclre1a	LD_1	Missense_Mutation	SNP	missense_variant	chr19	56544873	56544873	+	C	C/G	C/C	c.1288G>C	p.A430P	-	-	-	90	68	22	0.244444	-	-	-	-
Dhtkd1	LD_1	Missense_Mutation	SNP	missense_variant	chr2	5921824	5921824	+	C	C/T	C/C	c.1003G>A	p.A335T	-	-	-	95	0	95	1	-	-	-	-
Dio1	LD_1	Frame_Shift_Del	DEL	frameshift_variant	chr4	107306840	107306849	+	GGGGGCCAGC	GGGGGCCAGC/-	GGGGGCCAGC/GGGGGCCAGC	c.270_279del	p.L91Tfs*26	-	-	-	36	20	16	0.444444	-	-	-	-
Dmrta1	LD_1	Nonsense_Mutation	SNP	stop_gained	chr4	89691736	89691736	+	C	C/G	C/C	c.932C>G	p.S311*	-	-	-	101	56	45	0.445545	-	-	-	-
Dph5	LD_1	Missense_Mutation	SNP	missense_variant	chr3	115892736	115892736	+	A	A/G	A/A	c.160A>G	p.I54V	-	-	-	63	54	9	0.142857	-	-	-	-
Dst	LD_1	Missense_Mutation	SNP	missense_variant	chr1	34163022	34163022	+	C	C/T	C/C	c.1942C>T	p.R648C	-	-	-	156	104	52	0.333333	-	-	-	-
Eif5	LD_1	Frame_Shift_Ins	INS	frameshift_variant,splice_region_variant	chr12	111540572	111540573	+	-	-/AGAATAGTGACATT	-/-	c.439_439+1insAGAATAGTGACATT	p.G152Rfs*78	-	-	-	70	62	8	0.114286	-	-	-	-
Elp3	LD_1	Missense_Mutation	SNP	missense_variant	chr14	65586350	65586350	+	G	G/A	G/G	c.223C>T	p.R75C	-	-	-	80	71	9	0.1125	-	-	-	-
Eppk1	LD_1	Missense_Mutation	SNP	missense_variant	chr15	76108290	76108290	+	G	G/C	G/G	c.4390C>G	p.P1464A	-	-	-	122	50	72	0.590164	-	-	-	-
Fam169b	LD_1	Splice_Site	DEL	splice_acceptor_variant,intron_variant	chr7	68304548	68304550	+	TTA	TTA/-	TTA/TTA	c.148-4_148-2del	p.X50_splice	-	-	-	37	28	9	0.243243	-	-	-	-
Fignl1	LD_1	Missense_Mutation	SNP	missense_variant	chr11	11802771	11802771	+	C	C/A	C/C	c.283G>T	p.A95S	-	-	-	105	64	41	0.390476	-	-	-	-
Ghr	LD_1	Missense_Mutation	SNP	missense_variant	chr15	3341060	3341060	+	C	C/G	C/C	c.322G>C	p.E108Q	-	-	-	78	63	15	0.192308	-	-	-	-
Gid8	LD_1	Missense_Mutation	SNP	missense_variant	chr2	180717845	180717845	+	G	G/C	G/G	c.521G>C	p.S174T	-	-	-	31	25	6	0.193548	-	-	-	-
Gls2	LD_1	Missense_Mutation	SNP	missense_variant	chr10	128200288	128200288	+	C	C/T	C/C	c.520C>T	p.P174S	-	-	-	40	26	14	0.35	-	-	-	-
Gria3	LD_1	Nonsense_Mutation	SNP	stop_gained	chrX	41610163	41610163	+	G	G/T	G/G	c.1732G>T	p.E578*	-	-	-	33	0	33	1	-	-	-	-
Grid2ip	LD_1	Missense_Mutation	SNP	missense_variant	chr5	143357584	143357584	+	T	T/G	T/T	c.34T>G	p.F12V	-	-	-	25	16	9	0.36	-	-	-	-
Grik2	LD_1	Missense_Mutation	SNP	missense_variant	chr10	49419693	49419693	+	C	C/G	C/C	c.1178G>C	p.S393T	-	-	-	103	66	37	0.359223	-	-	-	-
Grin3b	LD_1	Missense_Mutation	SNP	missense_variant	chr10	79973210	79973210	+	C	C/G	C/C	c.793C>G	p.P265A	-	-	-	33	26	7	0.212121	-	-	-	-
Gucy2d	LD_1	Missense_Mutation	SNP	missense_variant	chr7	98458670	98458670	+	A	A/C	A/A	c.2033A>C	p.K678T	-	-	-	45	23	22	0.488889	-	-	-	-
Hebp1	LD_1	Missense_Mutation	SNP	missense_variant	chr6	135152963	135152963	+	C	C/G	C/C	c.256G>C	p.V86L	-	-	-	90	0	90	1	rs13467607	-	-	-
Hecw1	LD_1	Missense_Mutation	SNP	missense_variant	chr13	14266000	14266000	+	T	T/G	T/T	c.3704A>C	p.K1235T	-	-	-	44	29	15	0.340909	-	-	-	-
Hk1	LD_1	Missense_Mutation	SNP	missense_variant	chr10	62286601	62286601	+	G	G/T	G/G	c.1398C>A	p.D466E	-	-	-	32	21	11	0.34375	-	-	-	-
Hnrnpl	LD_1	Missense_Mutation	SNP	missense_variant	chr7	28815305	28815305	+	A	A/G	A/A	c.824A>G	p.N275S	-	-	-	82	55	27	0.329268	-	-	-	-
Igbp1b	LD_1	Missense_Mutation	SNP	missense_variant	chr6	138657478	138657478	+	G	G/T	G/G	c.967C>A	p.Q323K	-	-	-	66	24	42	0.636364	-	-	-	-
Igkv8-18	LD_1	Missense_Mutation	SNP	missense_variant	chr6	70356169	70356169	+	G	G/C	G/G	c.94G>C	p.A32P	-	-	-	223	160	63	0.282511	-	-	-	-
Inppl1	LD_1	Missense_Mutation	SNP	missense_variant	chr7	101826628	101826628	+	C	C/G	C/C	c.2540G>C	p.G847A	-	-	-	37	19	18	0.486486	-	-	-	-
Ints3	LD_1	Splice_Site	SNP	splice_acceptor_variant	chr3	90401974	90401974	+	T	T/G	T/T	c.1634-2A>C	p.X545_splice	-	-	-	59	31	28	0.474576	-	-	-	-
Kifc3	LD_1	Missense_Mutation	SNP	missense_variant	chr8	95137966	95137966	+	T	T/G	T/T	c.115A>C	p.S39R	-	-	-	28	22	6	0.214286	-	-	-	-
Klk14	LD_1	Missense_Mutation	SNP	missense_variant	chr7	43692077	43692077	+	G	G/A	G/G	c.152G>A	p.C51Y	-	-	-	32	14	18	0.5625	-	-	-	-
Kmt2a	LD_1	Missense_Mutation	SNP	missense_variant	chr9	44808104	44808104	+	C	C/T	C/C	c.11690G>A	p.R3897H	-	-	-	69	34	35	0.507246	-	-	-	-
Kmt2c	LD_1	Missense_Mutation	SNP	missense_variant	chr5	25320353	25320353	+	G	G/C	G/G	c.5006C>G	p.A1669G	-	-	-	135	97	38	0.281481	-	-	-	-
Krt32	LD_1	Missense_Mutation	SNP	missense_variant	chr11	100081217	100081217	+	A	A/G	A/A	c.1304T>C	p.V435A	-	-	-	49	38	11	0.22449	-	-	-	-
Krt34	LD_1	Missense_Mutation	SNP	missense_variant	chr11	100038775	100038775	+	G	G/C	G/G	c.804C>G	p.C268W	-	-	-	212	121	91	0.429245	-	-	-	-
Lat	LD_1	Missense_Mutation	SNP	missense_variant	chr7	126364611	126364611	+	A	A/C	A/A	c.516T>G	p.C172W	-	-	-	53	47	6	0.113208	-	-	-	-
Lgr6	LD_1	Missense_Mutation	SNP	missense_variant	chr1	134994010	134994010	+	C	C/T	C/C	c.1426G>A	p.A476T	-	-	-	41	31	10	0.243902	-	-	-	-
Lrrc17	LD_1	Missense_Mutation	SNP	missense_variant	chr5	21560534	21560534	+	G	G/C	G/G	c.13G>C	p.A5P	-	-	-	29	8	21	0.724138	-	-	-	-
Mcoln2	LD_1	Missense_Mutation	SNP	missense_variant	chr3	146190326	146190326	+	A	A/G	A/A	c.1402A>G	p.T468A	-	-	-	84	54	30	0.357143	-	-	-	-
Mib2	LD_1	Missense_Mutation	SNP	missense_variant	chr4	155661003	155661003	+	A	A/G	A/A	c.266T>C	p.I89T	-	-	-	56	27	29	0.517857	-	-	-	-
Mpdz	LD_1	Missense_Mutation	SNP	missense_variant	chr4	81308349	81308349	+	C	C/T	C/C	c.4045G>A	p.G1349S	-	-	-	37	24	13	0.351351	-	-	-	-
Mrps26	LD_1	Missense_Mutation	SNP	missense_variant,splice_region_variant	chr2	130564081	130564081	+	G	G/C	G/G	c.213G>C	p.R71S	-	-	-	32	10	22	0.6875	-	-	-	-
Myb	LD_1	Splice_Site	SNP	splice_acceptor_variant	chr10	21148859	21148859	+	C	C/G	C/C	c.763-1G>C	p.X255_splice	-	-	-	44	32	12	0.272727	-	-	-	-
Myh7	LD_1	Missense_Mutation	SNP	missense_variant	chr14	54992730	54992730	+	C	C/G	C/C	c.144G>C	p.K48N	-	-	-	48	26	22	0.458333	-	-	-	-
Myh9	LD_1	Missense_Mutation	SNP	missense_variant	chr15	77775216	77775216	+	G	G/A	G/G	c.2696C>T	p.A899V	-	-	-	36	12	24	0.666667	-	-	-	-
Myo18b	LD_1	Missense_Mutation	SNP	missense_variant	chr5	112723906	112723906	+	C	C/T	C/C	c.6308G>A	p.R2103K	-	-	-	54	41	13	0.240741	-	-	-	-
Myo1b	LD_1	Missense_Mutation	SNP	missense_variant	chr1	51813054	51813054	+	C	C/A	C/C	c.511G>T	p.D171Y	-	-	-	74	52	22	0.297297	-	-	-	-
Nkx6-3	LD_1	Missense_Mutation	SNP	missense_variant,splice_region_variant	chr8	23156201	23156201	+	C	C/A	C/C	c.386C>A	p.T129N	-	-	-	53	25	28	0.528302	-	-	-	-
Nlrp9c	LD_1	Missense_Mutation	SNP	missense_variant	chr7	26385416	26385416	+	T	T/C	T/T	c.737A>G	p.K246R	-	-	-	116	70	46	0.396552	-	-	-	-
Nr1h3	LD_1	Missense_Mutation	SNP	missense_variant	chr2	91191942	91191942	+	C	C/G	C/C	c.340G>C	p.E114Q	-	-	-	62	16	46	0.741935	-	-	-	-
Numa1	LD_1	Missense_Mutation	SNP	missense_variant	chr7	102000053	102000053	+	C	C/T	C/C	c.2990C>T	p.T997I	-	-	-	24	10	14	0.583333	-	-	-	-
Nupl1	LD_1	Missense_Mutation	SNP	missense_variant	chr14	60244552	60244552	+	C	C/G	C/C	c.362G>C	p.G121A	-	-	-	54	39	15	0.277778	-	-	-	-
Olfr1014	LD_1	Missense_Mutation	SNP	missense_variant	chr2	85777492	85777492	+	C	C/G	C/C	c.907C>G	p.L303V	-	-	-	108	84	24	0.222222	-	-	-	-
Olfr1216	LD_1	Frame_Shift_Ins	INS	frameshift_variant	chr2	89013992	89013993	+	-	-/T	-/-	c.70dup	p.I24Nfs*17	-	-	-	151	91	60	0.397351	-	-	-	-
Olfr1268-ps1	LD_1	Missense_Mutation	SNP	missense_variant	chr2	90110883	90110883	+	G	G/T	G/G	c.505C>A	p.P169T	-	-	-	21	7	14	0.666667	-	-	-	-
Olfr1277	LD_1	Missense_Mutation	SNP	missense_variant	chr2	111269618	111269618	+	A	A/C	A/A	c.748T>G	p.F250V	-	-	-	92	34	58	0.630435	-	-	-	-
Olfr59	LD_1	Missense_Mutation	SNP	missense_variant	chr11	74289056	74289056	+	A	A/T	A/A	c.409A>T	p.S137C	-	-	-	261	177	84	0.321839	-	-	-	-
Olfr746	LD_1	Missense_Mutation	SNP	missense_variant	chr14	50653721	50653721	+	C	C/A	C/C	c.483C>A	p.F161L	-	-	-	172	162	10	0.0581395	-	-	-	-
Olfr775	LD_1	Missense_Mutation	SNP	missense_variant	chr10	129251032	129251032	+	T	T/G	T/T	c.497T>G	p.F166C	-	-	-	269	184	85	0.315985	-	-	-	-
Olfr853	LD_1	Missense_Mutation	SNP	missense_variant	chr9	19537891	19537891	+	A	A/C	A/A	c.38T>G	p.F13C	-	-	-	57	46	11	0.192982	-	-	-	-
Oog3	LD_1	Missense_Mutation	SNP	missense_variant	chr4	144159269	144159269	+	A	A/G	A/A	c.758T>C	p.L253P	-	-	-	165	73	92	0.557576	-	-	-	-
Pabpc4	LD_1	Missense_Mutation	SNP	missense_variant	chr4	123295216	123295216	+	C	C/G	C/C	c.1348C>G	p.P450A	-	-	-	64	29	35	0.546875	-	-	-	-
Pabpc6	LD_1	Missense_Mutation	SNP	missense_variant	chr17	9668141	9668141	+	G	G/C	G/G	c.1480C>G	p.Q494E	-	-	-	64	46	18	0.28125	-	-	-	-
Pappa	LD_1	Missense_Mutation	SNP	missense_variant	chr4	65327025	65327025	+	T	T/G	T/T	c.4549T>G	p.L1517V	-	-	-	147	99	48	0.326531	-	-	-	-
Pcdha5	LD_1	Missense_Mutation	SNP	missense_variant	chr18	36962352	36962352	+	A	A/C	A/A	c.1913A>C	p.D638A	-	-	-	96	43	53	0.552083	-	-	-	-
Pdgfra	LD_1	Missense_Mutation	SNP	missense_variant	chr5	75166652	75166652	+	C	C/T	C/C	c.509C>T	p.A170V	-	-	-	112	88	24	0.214286	-	-	-	-
Pdzrn3	LD_1	Missense_Mutation	SNP	missense_variant	chr6	101150562	101150562	+	G	G/C	G/G	c.3142C>G	p.P1048A	-	-	-	169	122	47	0.278107	-	-	-	-
Pkp1	LD_1	Missense_Mutation	SNP	missense_variant	chr1	135877792	135877792	+	T	T/G	T/T	c.1905A>C	p.E635D	-	-	-	72	15	57	0.791667	-	-	-	-
Poteg	LD_1	Missense_Mutation	SNP	missense_variant	chr8	27447962	27447962	+	G	G/A	G/G	c.145G>A	p.G49R	-	-	-	94	63	31	0.329787	-	-	-	-
Ppargc1a	LD_1	Missense_Mutation	SNP	missense_variant	chr5	51474252	51474252	+	T	T/G	T/T	c.1034A>C	p.K345T	-	-	-	26	18	8	0.307692	-	-	-	-
Pramel3	LD_1	Missense_Mutation	SNP	missense_variant	chrX	135307629	135307629	+	C	C/G	C/C	c.287C>G	p.T96S	-	-	-	40	8	32	0.8	-	-	-	-
Ptchd4	LD_1	Missense_Mutation	SNP	missense_variant	chr17	42316937	42316937	+	C	C/G	C/C	c.288C>G	p.S96R	-	-	-	48	33	15	0.3125	-	-	-	-
Pth2r	LD_1	Missense_Mutation	SNP	missense_variant	chr1	65345341	65345341	+	C	C/G	C/C	c.538C>G	p.H180D	-	-	-	69	52	17	0.246377	-	-	-	-
Ralgps2	LD_1	Missense_Mutation	SNP	missense_variant	chr1	156828145	156828145	+	G	G/C	G/G	c.1208C>G	p.S403C	-	-	-	30	23	7	0.233333	-	-	-	-
Rbm33	LD_1	Missense_Mutation	SNP	missense_variant	chr5	28339279	28339279	+	G	G/A	G/G	c.532G>A	p.E178K	-	-	-	68	12	56	0.823529	-	-	-	-
Rgp1	LD_1	Missense_Mutation	SNP	missense_variant	chr4	43583049	43583049	+	C	C/G	C/C	c.1142C>G	p.A381G	-	-	-	52	22	30	0.576923	-	-	-	-
Rpn2	LD_1	Missense_Mutation	SNP	missense_variant	chr2	157310211	157310211	+	A	A/C	A/A	c.1103A>C	p.K368T	-	-	-	110	35	75	0.681818	-	-	-	-
Rps6ka4	LD_1	Missense_Mutation	SNP	missense_variant	chr19	6831044	6831044	+	C	C/G	C/C	c.1744G>C	p.A582P	-	-	-	55	27	28	0.509091	-	-	-	-
Rtn4	LD_1	Missense_Mutation	SNP	missense_variant	chr11	29741002	29741002	+	T	T/C	T/T	c.3292T>C	p.F1098L	-	-	-	152	102	50	0.328947	-	-	-	-
Ryr1	LD_1	Missense_Mutation	SNP	missense_variant	chr7	29095151	29095151	+	C	C/T	C/C	c.3682G>A	p.A1228T	-	-	-	30	14	16	0.533333	-	-	-	-
Ryr2	LD_1	Nonsense_Mutation	SNP	stop_gained	chr13	11649786	11649786	+	C	C/A	C/C	c.10630G>T	p.E3544*	-	-	-	42	34	8	0.190476	-	-	-	-
Ryr2	LD_1	Missense_Mutation	SNP	missense_variant	chr13	11687021	11687021	+	C	C/G	C/C	c.8749G>C	p.E2917Q	-	-	-	60	55	5	0.0833333	-	-	-	-
Scin	LD_1	Missense_Mutation	SNP	missense_variant	chr12	40060543	40060543	+	G	G/T	G/G	c.2105C>A	p.T702K	-	-	-	31	15	16	0.516129	-	-	-	-
Scn8a	LD_1	Missense_Mutation	SNP	missense_variant	chr15	101032287	101032287	+	G	G/A	G/G	c.4378G>A	p.V1460I	-	-	-	98	52	46	0.469388	-	-	-	-
Sept10	LD_1	Missense_Mutation	SNP	missense_variant	chr10	59181159	59181159	+	G	G/C	G/G	c.542C>G	p.A181G	-	-	-	75	67	8	0.106667	-	-	-	-
Sipa1l2	LD_1	Missense_Mutation	SNP	missense_variant	chr8	125433189	125433189	+	C	C/G	C/C	c.4751G>C	p.R1584P	-	-	-	50	37	13	0.26	-	-	-	-
Slc26a10	LD_1	Splice_Site	SNP	splice_donor_variant	chr10	127178341	127178341	+	A	A/C	A/A	c.801+2T>G	p.X267_splice	-	-	-	28	21	7	0.25	-	-	-	-
Slc6a19	LD_1	Missense_Mutation	SNP	missense_variant	chr13	73681646	73681646	+	C	C/G	C/C	c.1888G>C	p.G630R	-	-	-	80	59	21	0.2625	-	-	-	-
Slco5a1	LD_1	Missense_Mutation	SNP	missense_variant	chr1	12894535	12894535	+	T	T/G	T/T	c.1517A>C	p.K506T	-	-	-	55	21	34	0.618182	-	-	-	-
Sorl1	LD_1	Missense_Mutation	SNP	missense_variant	chr9	42031873	42031873	+	A	A/C	A/A	c.2706T>G	p.I902M	-	-	-	32	21	11	0.34375	-	-	-	-
Spz1	LD_1	Missense_Mutation	SNP	missense_variant	chr13	92575578	92575578	+	T	T/C	T/T	c.389A>G	p.D130G	-	-	-	140	58	82	0.585714	-	-	-	-
Sspo	LD_1	Missense_Mutation	SNP	missense_variant	chr6	48495300	48495300	+	A	A/C	A/A	c.14427A>C	p.Q4809H	-	-	-	39	34	5	0.128205	-	-	-	-
St6gal2	LD_1	Missense_Mutation	SNP	missense_variant	chr17	55510371	55510371	+	C	C/T	C/C	c.1534C>T	p.L512F	-	-	-	70	53	17	0.242857	-	-	-	-
Syce1	LD_1	Missense_Mutation	SNP	missense_variant,splice_region_variant	chr7	140782089	140782089	+	C	C/T	C/C	c.80G>A	p.G27E	-	-	-	91	62	29	0.318681	-	-	-	-
Syncrip	LD_1	Missense_Mutation	SNP	missense_variant	chr9	88462334	88462334	+	A	A/C	A/A	c.1060T>G	p.L354V	-	-	-	62	42	20	0.322581	-	-	-	-
Syt16	LD_1	Nonsense_Mutation	SNP	stop_gained	chr12	74222623	74222623	+	G	G/T	G/G	c.235G>T	p.E79*	-	-	-	37	8	29	0.783784	-	-	-	-
Taf1d	LD_1	In_Frame_Del	DEL	inframe_deletion,splice_region_variant	chr9	15308525	15308536	+	TGATGACTCCTC	TGATGACTCCTC/-	TGATGACTCCTC/TGATGACTCCTC	c.74_85del	p.D25_D28del	-	-	-	72	48	24	0.333333	-	-	-	-
Tas2r139	LD_1	Missense_Mutation	SNP	missense_variant	chr6	42141663	42141663	+	T	T/C	T/T	c.728T>C	p.I243T	-	-	-	112	41	71	0.633929	-	-	-	-
Tcea1	LD_1	Missense_Mutation	SNP	missense_variant	chr1	4867476	4867476	+	G	G/A	G/G	c.103G>A	p.A35T	-	-	-	104	98	6	0.0576923	-	-	-	-
Tenm4	LD_1	Missense_Mutation	SNP	missense_variant	chr7	96874249	96874249	+	C	C/T	C/C	c.4997C>T	p.P1666L	-	-	-	121	94	27	0.22314	-	-	-	-
Tle4	LD_1	Missense_Mutation	SNP	missense_variant	chr19	14466665	14466665	+	G	G/A	G/G	c.820C>T	p.P274S	-	-	-	53	35	18	0.339623	-	-	-	-
Tlr9	LD_1	Missense_Mutation	SNP	missense_variant	chr9	106224125	106224125	+	C	C/A	C/C	c.614C>A	p.S205Y	-	-	-	69	39	30	0.434783	-	-	-	-
Tmeff1	LD_1	Missense_Mutation	SNP	missense_variant	chr4	48650408	48650408	+	G	G/A	G/G	c.865G>A	p.A289T	-	-	-	115	80	35	0.304348	-	-	-	-
Tmem236	LD_1	Missense_Mutation	SNP	missense_variant	chr2	14174800	14174800	+	C	C/G	C/C	c.211C>G	p.L71V	-	-	-	94	76	18	0.191489	-	-	-	-
Trav17	LD_1	Missense_Mutation	SNP	missense_variant	chr14	53806983	53806983	+	T	T/A	T/T	c.209T>A	p.I70N	-	-	-	51	22	29	0.568627	-	-	-	-
Trim69	LD_1	Missense_Mutation	SNP	missense_variant	chr2	122178885	122178885	+	A	A/C	A/A	c.1425A>C	p.K475N	-	-	-	139	46	93	0.669065	-	-	-	-
Triml2	LD_1	Missense_Mutation	SNP	missense_variant	chr8	43183250	43183250	+	C	C/G	C/C	c.71C>G	p.P24R	-	-	-	75	46	29	0.386667	-	-	-	-
Trp53	LD_1	Missense_Mutation	SNP	missense_variant	chr11	69589211	69589211	+	G	G/C	G/G	c.734G>C	p.R245P	-	-	-	82	0	82	1	-	-	-	-
Ttc39d	LD_1	Missense_Mutation	SNP	missense_variant	chr17	80216455	80216455	+	A	A/G	A/A	c.542A>G	p.Q181R	-	-	-	93	68	25	0.268817	-	-	-	-
Ttn	LD_1	Missense_Mutation	SNP	missense_variant	chr2	76771525	76771525	+	T	T/G	T/T	c.50554A>C	p.I16852L	-	-	-	171	109	62	0.362573	-	-	-	-
Ubap2	LD_1	Missense_Mutation	SNP	missense_variant	chr4	41235546	41235546	+	C	C/T	C/C	c.148G>A	p.D50N	-	-	-	63	48	15	0.238095	-	-	-	-
Uggt2	LD_1	Missense_Mutation	SNP	missense_variant,splice_region_variant	chr14	119083855	119083855	+	T	T/G	T/T	c.803A>C	p.K268T	-	-	-	66	46	20	0.30303	-	-	-	-
Ugt2b37	LD_1	Missense_Mutation	SNP	missense_variant	chr5	87254479	87254479	+	T	T/C	T/T	c.292A>G	p.T98A	-	-	-	174	119	55	0.316092	-	-	-	-
Vmn1r225	LD_1	Missense_Mutation	SNP	missense_variant	chr17	20502412	20502412	+	C	C/G	C/C	c.114C>G	p.C38W	-	-	-	115	79	36	0.313043	-	-	-	-
Vmn2r111	LD_1	Nonsense_Mutation	SNP	stop_gained	chr17	22547966	22547966	+	G	G/T	G/G	c.2549C>A	p.S850*	-	-	-	235	203	32	0.13617	-	-	-	-
Vmn2r70	LD_1	Missense_Mutation	SNP	missense_variant	chr7	85563785	85563785	+	T	T/G	T/T	c.1413A>C	p.K471N	-	-	-	89	46	43	0.483146	-	-	-	-
Vmn2r73	LD_1	Missense_Mutation	SNP	missense_variant	chr7	85872050	85872050	+	T	T/G	T/T	c.709A>C	p.I237L	-	-	-	146	62	84	0.575342	-	-	-	-
Vmn2r76	LD_1	Missense_Mutation	SNP	missense_variant	chr7	86230177	86230177	+	A	A/C	A/A	c.914T>G	p.I305S	-	-	-	64	35	29	0.453125	-	-	-	-
Vmn2r78	LD_1	Frame_Shift_Ins	INS	frameshift_variant	chr7	86920248	86920249	+	-	-/A	-/-	c.356dup	p.E120Gfs*5	-	-	-	75	33	42	0.56	-	-	-	-
Vwa3b	LD_1	Missense_Mutation	SNP	missense_variant	chr1	37063535	37063535	+	G	G/T	G/G	c.896G>T	p.G299V	-	-	-	68	54	14	0.205882	-	-	-	-
Vwa7	LD_1	Missense_Mutation	SNP	missense_variant	chr17	35023713	35023713	+	A	A/G	A/A	c.1741A>G	p.T581A	-	-	-	80	59	21	0.2625	-	-	-	-
Was	LD_1	Missense_Mutation	SNP	missense_variant	chrX	8089117	8089117	+	A	A/C	A/A	c.388T>G	p.F130V	-	-	-	29	0	29	1	-	-	-	-
Wdr76	LD_1	Missense_Mutation	SNP	missense_variant	chr2	121534126	121534126	+	A	A/T	A/A	c.910A>T	p.N304Y	-	-	-	89	67	22	0.247191	-	-	-	-
Wdr90	LD_1	Missense_Mutation	SNP	missense_variant	chr17	25846377	25846377	+	T	T/A	T/T	c.4904A>T	p.E1635V	-	-	-	43	13	30	0.697674	-	-	-	-
Zc3hav1l	LD_1	Missense_Mutation	SNP	missense_variant	chr6	38297964	38297964	+	G	G/C	G/G	c.501C>G	p.C167W	-	-	-	62	43	19	0.306452	-	-	-	-
Zfhx4	LD_1	Missense_Mutation	SNP	missense_variant	chr3	5399192	5399192	+	C	C/T	C/C	c.4409C>T	p.A1470V	-	-	-	80	75	5	0.0625	-	-	-	-
Zfyve27	LD_1	Frame_Shift_Del	DEL	frameshift_variant	chr19	42190405	42190406	+	TG	TG/-	TG/TG	c.1216_1217del	p.C406Rfs*24	-	-	-	115	109	6	0.0521739	-	-	-	-
