# Supplementary material for: Gut Microbiome Directs Hepatocytes to Recruit MDSCs and Promote Cholangiocarcinoma
Source: Oxford University Press journal article supplement (doi:10.1158/2159-8290.cd-20-0304), 2020-12-15
Supplement: 21598290cd200304-sup-239155_2_supp_6747215_qkbm9n.docx [file 21598290cd200304-sup-239155_2_supp_6747215_qkbm9n.docx]

**Supplementary Table S2 KEY RESOURCES TABLE**

| Deposited Data | | |
| --- | --- | --- |
| ICGC | (1) | GEO: GSE89749 (https://www.ncbi.nlm.  nih.gov/geo/query/acc.cgi?acc=  GSE89749) |
| Japan | European Genome-phenome Archive  (https://www.ebi.ac.uk/ega/home) | EGA: EGAS00001000950 (https://www.ebi.  ac.uk/ega/studies/EGAS00001000950) |
| Thailand | (2) | GEO: GSE76297 (<https://www.ncbi.nlm.nih.gov/geo/query/acc.cgi?acc=GSE76297>) |

**References**

1. Jusakul A, Cutcutache I, Yong CH, Lim JQ, Huang MN, Padmanabhan N*, et al.* Whole-Genome and Epigenomic Landscapes of Etiologically Distinct Subtypes of Cholangiocarcinoma. Cancer Discov **2017**;7(10):1116-35 doi 10.1158/2159-8290.CD-17-0368.

2. Chaisaingmongkol J, Budhu A, Dang H, Rabibhadana S, Pupacdi B, Kwon SM*, et al.* Common Molecular Subtypes Among Asian Hepatocellular Carcinoma and Cholangiocarcinoma. Cancer Cell **2017**;32(1):57-70 e3 doi 10.1016/j.ccell.2017.05.009.
